# Supplementary material for: Risk Factors Associated With Severe Hypoglycemia in Older Adults With Type 1 Diabetes
Source: Oxford University Press journal article supplement (doi:10.2337/dc15-1426), 2015-12-17
Supplement: dc151426supplementarydata.pdf [file dc151426supplementarydata.pdf]

SUPPLEMENTARY DATA

Table of Contents

|                                                                                             |          |
|---------------------------------------------------------------------------------------------|----------|
| <b>Table S1. Clarke Hypoglycemia Unawareness Questionnaire-Relevant Questions .....</b>     | <b>2</b> |
| <b>Table S2. Severe Hypoglycemia Frequency.....</b>                                         | <b>3</b> |
| <b>Table S3. Blinded Continuous Glucose Monitor Data from Subsets of Day and Night.....</b> | <b>4</b> |
| <b>List of Investigators .....</b>                                                          | <b>5</b> |

SUPPLEMENTARY DATA

**Supplementary Table S1. Clarke Hypoglycemia Unawareness Questionnaire-Relevant Questions**

|                                                                                         | Case          | Control      | <i>p-value</i> |
|-----------------------------------------------------------------------------------------|---------------|--------------|----------------|
|                                                                                         | <b>N =101</b> | <b>N=100</b> |                |
|                                                                                         |               |              |                |
| <b>Check the category that best describes you: (check one only)</b>                     |               |              | <0.001         |
| I always have symptoms when my blood sugar is low                                       | 17 (17%)      | 57 (57%)     |                |
| I sometimes have symptoms when my blood sugar is low                                    | 69 (68%)      | 39 (39%)     |                |
| I no longer have symptoms when my blood sugar is low                                    | 15 (15%)      | 4 (4%)       |                |
|                                                                                         |               |              |                |
| <b>Have you lost some of symptoms that used to occur when your blood sugar was low?</b> |               |              | 0.001          |
| Yes                                                                                     | 76 (75%)      | 48 (48%)     |                |
| No                                                                                      | 25 (25%)      | 52 (52%)     |                |
|                                                                                         |               |              |                |
| <b>How low does your blood sugar need to go before you feel symptoms?*</b>              |               |              | 0.002          |
| 60-69 mg/dL                                                                             | 22 (22%)      | 46 (46%)     |                |
| 50-59 mg/dL                                                                             | 32 (32%)      | 35 (35%)     |                |
| 40-49 mg/dL                                                                             | 25 (25%)      | 15 (15%)     |                |
| <40 mg/dL                                                                               | 20 (20%)      | 3 (3%)       |                |
|                                                                                         |               |              |                |
| <b>To what extent can you tell by your symptoms that your blood sugar is low?</b>       |               |              | <0.001         |
| Never                                                                                   | 6 (6%)        | 0            |                |
| Rarely                                                                                  | 11 (11%)      | 6 (6%)       |                |
| Sometimes                                                                               | 42 (42%)      | 19(19%)      |                |
| Often                                                                                   | 31 (31%)      | 32 (32%)     |                |
| Always                                                                                  | 11 (11%)      | 43 (43%)     |                |

\*Response missing for 2 cases and 1 control

SUPPLEMENTARY DATA

**Supplementary Table S2. Severe Hypoglycemia Frequency**

|                                                | <b>Case</b>  | <b>Control</b> |
|------------------------------------------------|--------------|----------------|
|                                                | <b>N=101</b> | <b>N=100</b>   |
| <b>All</b>                                     | 101          | 100            |
| <b>Severe Hypoglycemia Since T1D Diagnosis</b> |              |                |
| 0 events                                       | -            | 33 (33%)       |
| 1 event                                        | 4 (4%)       | 16 (16%)       |
| 2-4 events                                     | 9 (9%)       | 17 (17%)       |
| 5-9 events                                     | 14 (14%)     | 18 (18%)       |
| 10-19 events                                   | 21 (21%)     | 7 (7%)         |
| ≥20 events                                     | 53 (52%)     | 9 (9%)         |

SUPPLEMENTARY DATA

**Supplementary Table S3. Blinded Continuous Glucose Monitor Data from Subsets of Day and Night**

|                                                  | <b>Case</b>       | <b>Control</b>    | <i>p-value</i> <sup>‡</sup> |
|--------------------------------------------------|-------------------|-------------------|-----------------------------|
|                                                  | <b>N=101</b>      | <b>N=100</b>      |                             |
| <b>DAYTIME<sup>α</sup> (8 am to 8 pm)</b>        |                   |                   |                             |
| Mean Glucose- <i>mean±SD</i>                     | 178±32.3          | 180±36.4          | 0.67                        |
| Percentage of Time <70 mg/dL-%                   | 6.1 (3.3, 9.9)    | 4.2 (1.9, 8.7)    | 0.03                        |
| Percentage of Time <60 mg/dL-%                   | 4.3 (1.7, 7.0)    | 2.5 (1.1, 5.1)    | 0.02                        |
| Percentage of Time <50 mg/dL-%                   | 2.2 (0.7, 4.6)    | 1.2 (0.3, 2.7)    | 0.008                       |
| Percentage of Time >180 mg/dL-%                  | 43.7 (34.1, 53.9) | 41.8 (30.8, 58.4) | 0.84                        |
| Percentage of Time in Range (70-180 mg/dL)<br>-% | 48.6 (41.1, 58.5) | 52.0 (40.8, 61.0) | 0.33                        |
| Glucose Variability <sup>‡</sup> -%CV            | 43.6 (38.1, 47.8) | 40.1 (35.6, 45.3) | 0.006                       |
|                                                  |                   |                   |                             |
| <b>NIGHTTIME<sup>Ω</sup> (midnight to 4 am)</b>  |                   |                   |                             |
| Mean Glucose- <i>mean±SD</i>                     | 168±41.4          | 167±43.2          | 0.50                        |
| Percentage of Time <70 mg/dL-%                   | 6.0 (1.2, 13.8)   | 6.1 (0.0, 13.1)   | 0.59                        |
| Percentage of Time <60 mg/dL-%                   | 3.6 (0.1, 9.4)    | 2.6 (0.0, 8.7)    | 0.32                        |
| Percentage of Time <50 mg/dL-%                   | 1.6 (0.0, 8.0)    | 0.6 (0.0, 6.2)    | 0.21                        |
| Percentage of Time >180 mg/dL-%                  | 38.2 (21.1, 53.6) | 36.3 (20.1, 56.0) | 0.60                        |
| Percentage of Time in Range (70-180 mg/dL)<br>-% | 53.9 (40.6, 63.4) | 53.8 (40.8, 64.2) | 0.66                        |
| Glucose Variability <sup>‡</sup> -%CV            | 40.0 (33.5, 49.0) | 38.0 (31.6, 45.3) | 0.08                        |

Unless otherwise indicated, all values are medians (25<sup>th</sup>, 75<sup>th</sup> percentile)

<sup>‡</sup>P value adjusted for age and SMBG; rank scores used to obtain p value

<sup>α</sup>Daytime CGM data missing for 3 cases and 1 control

<sup>‡</sup>Coefficient of variation (CV) of glucose variability [(std dev/mean of glucose)\*100]

<sup>Ω</sup>Nighttime CGM data missing for 10 cases and 6 controls
